# Supplementary material
Source: PubMed Central journal article supplement (PMC4263858)
Supplement: supp_M114.604132_jbc.M114.604132-1.pdf [file supp_M114.604132_jbc.M114.604132-1.pdf]

**SUPPLEMENTAL MATERIAL**

The E2 ubiquitin conjugating enzyme UBE2J1 is required for spermiogenesis in mice

**Paul-Albert Koenig<sup>1</sup>, Peter K. Nicholls<sup>1</sup>, Florian I. Schmidt<sup>1</sup>, Masatoshi Hagiwara<sup>1</sup>, Takeshi Maruyama<sup>1</sup>, Galit H. Frydman<sup>2</sup>, Nicki Watson<sup>1</sup>, David C. Page<sup>1,3,4</sup>, Hidde L. Ploegh<sup>1,3</sup>**

<sup>1</sup> Whitehead Institute for Biomedical Research, Cambridge, MA 02142, USA

<sup>2</sup> Division of Comparative Medicine, Massachusetts Institute of Technology, Cambridge, MA 02139, USA

<sup>3</sup> Department of Biology, Massachusetts Institute of Technology, Cambridge, MA 02142, USA

<sup>4</sup> Howard Hughes Medical Institute, Cambridge, MA 02142, USA

\*Running title: *Male Ube2j1<sup>-/-</sup> mice are sterile*

To whom correspondence should be addressed: Hidde Ploegh, Whitehead Institute for Biomedical Research, 9 Cambridge Center, Cambridge 02142, MA, USA, Tel.: +1-617-324-2031; Fax: +1-617-452-3566; e-mail: ploegh@wi.mit.edu

**SUPPLEMENTAL MOVIES**

**MOVIE S1**

Motility of epididymal sperm preparation from a *Ube2j1<sup>+/+</sup>* (wild-type) mouse.

**MOVIE S2**

Motility of epididymal sperm preparation from a *Ube2j1<sup>-/-</sup>* mouse.

**MOVIE S3**

Hyaluronidase-treated oocytes incubated with epididymal sperm preparation from a *Ube2j1<sup>+/+</sup>* (wild type) mouse.

**MOVIE S4**

Hyaluronidase-treated oocytes incubated with epididymal sperm preparation from a *Ube2j1<sup>-/-</sup>* mouse.
